# Supplementary material
Source: PubMed Central journal article supplement (PMC10023496)
Supplement: NIHMS1872348-supplement-321604_Data_Supplement.pdf [file NIHMS1872348-supplement-321604_Data_Supplement.pdf]

## 1 **Supplemental Material**

### 2 **Expanded Materials and Methods**

#### 3 **Animals**

4 All protocols were approved by Temple University Lewis Katz School of Medicine  
5 Institutional Animal Care and Use Committee. Male and female mice of 9-12 weeks old  
6 were used in this study. C57BL/6J mice were purchased from Jackson Laboratory. For  
7 MADM mice: Myh6-merCremer (Stock # 005657), and MADM-ML-11<sup>GT/TG</sup> (Stock#  
8 030578) strains were obtained from The Jackson Laboratory. Mice were kept on a mixed  
9 C57BL/6:129SVJ background. Generation and genotyping of these lines has been  
10 described previously<sup>61, 62</sup>. Animals were randomly divided into 2 groups: normoxia  
11 controls and hypoxia. C57BL/6J mice also included a food restricted group where mice  
12 were fed the same amount of food that the hypoxia mice consumed. All mice were fed  
13 normal chow.

#### 14 **Hypoxia Chamber**

15 Two-person Vinyl Hypoxic Glove Box (Coy Laboratory) was used for this hypoxia study.  
16 The hypoxia chamber was equipped with an automatic purge airlock, automatic/active  
17 animal waste filtration system with a carbon dioxide sensor, oxygen control system with  
18 an oxygen sensor, nitrogen and oxygen gas regulator, dehumidifier, heated fans, and  
19 sleeves with gloves. Activated carbon and carbolime (Coy Laboratory) were used in the  
20 animal filtration system to cleanse the air of carbon dioxide and waste when carbon  
21 dioxide levels reached above 0.4%. For hypoxia, oxygen was decreased by 1% per day  
22 from 20.9% to 7% oxygen. Mice remained at 7% oxygen for an additional 2 weeks and

23 then placed back in normoxia for terminal echocardiography and euthanized to harvest  
24 hearts and tissues. Mice cages had lids with metal/wire bars to allow oxygen to flow into  
25 the cages. Mice cages were changed twice a week by placing new cages in the hypoxia  
26 chamber through the automatic purge airlock compartment, transferring mice from the old  
27 cages to the new cages using the attached sleeves with gloves, and old cages were  
28 removed from the hypoxia chamber through the airlock compartment. Water bottles were  
29 replaced each week.

### 30 **Drug administration**

31 Osmotic minipumps (Mini-Osmotic Pump Model 2004, 28 Days delivery, Alzet 0000298)  
32 filled with 5-ethynyl-2'-deoxyuridine (EdU; 15 mg/kg/day, Life Technologies E10187) were  
33 implanted subcutaneously (SQ) in mice one day before mice were placed in the hypoxia  
34 chamber. EdU was dissolved in a 1:1 ratio of DMSO and ddH<sub>2</sub>O. EdU was continuously  
35 delivered to the mice for 28 days via the minipump. Mice tissues were harvested at the  
36 end of the 4-week study. Tamoxifen (TM) (Sigma) was prepared by dissolving in corn oil  
37 (Sigma) to a concentration of 5 mg/mL. TM was injected intraperitoneally using a  
38 tuberculin syringe and a 25-gauge needle. Mice were given 50 ug/gram body weight per  
39 injection. Normoxic and hypoxic MADM<sup>Myh6-MerCreMer</sup> mice received an injection of  
40 tamoxifen intraperitoneally once every 3 days for a total of 5 injections during the last 2-  
41 week timeframe that mice were at 7% oxygen.

### 42 **Echocardiography**

43 Mice were placed under anesthesia using 1.5% isoflurane and underwent  
44 echocardiography at baseline (1 day before mice were placed in the hypoxia chamber)  
45 and at the end of the study; Hypoxic mice were acutely placed in normoxia for terminal

46 echocardiography then immediately tissues were harvested. Transthoracic  
47 Echocardiography was performed to measure cardiac function using the Vevo2100  
48 Ultrasound system (VisualSonics, Toronto, Canada). Images were obtained in the short-  
49 axis B mode and M mode at the level of the mid-papillary muscles for analysis of systolic  
50 function and chamber dimensions. A full parasternal long-axis view of the heart with the  
51 proper landmarks were obtained and M-mode images were collected for right ventricular  
52 dimensions as previously described<sup>63, 64</sup>. Length of left ventricle was measured with  
53 Simpson's measurements. The anterior wall of the right ventricle was measured by  
54 generic depth tool in M-mode. Diastolic function was measured using pulsed Doppler  
55 and tissue Doppler imaging (TDI). Analysis was performed offline using VevoLab v3.2.5  
56 (VisualSonics).

### 57 **Histology and Immunostaining**

58 At terminal, mice were weighed and anesthetized with inhaled isoflurane (Butler Shein  
59 Animal Health, Dublin, Ohio). Tissues including the heart and intestines were collected,  
60 rinsed with cold PBS, blotted dry, and weighed. Tissues were either snap frozen in liquid  
61 nitrogen or fixed with 10% Formalin (heart) or 4% paraformaldehyde (intestines).

62 Normoxic and hypoxic hearts from C57BL/6J mice were fixed in 10% Formalin,  
63 embedded in paraffin, and tissue blocks were sent to AML Laboratories (St. Augustine,  
64 FL) for sectioning and slides preparation. Picro-Sirius Red (PSR) staining was performed  
65 using a kit (Abcam, ab150681) to measure interstitial fibrosis and images were acquired  
66 using a Nikon Eclipse Ti Confocal microscope with DS-Ri2 light camera. Analysis of PSR  
67 staining was completed using the color threshold tool from NIH ImageJ software.  
68 Cardiomyocyte cross-sectional area was measured by Wheat Germ Agglutinin (WGA,

69 Life Technologies W11261) staining. Images were taken using Nikon Eclipse Ti Confocal  
70 microscope and analyzed using ImageJ. All immunohistochemistry and  
71 immunofluorescence experiments included a negative control where a tissue section did  
72 not receive primary antibody but was incubated with secondary antibody.

73 To test the efficacy of the 28-day EdU minipumps, intestines of the mice were fixed in 4%  
74 paraformaldehyde, embedded in OCT compound, and sectioned by cryosection. Intestine  
75 slides were stained with EdU and WGA after 28 days to detect EdU+ cells. EdU staining  
76 was performed using Click-IT EdU Cell Proliferation Kit for Imaging (Life Technologies,  
77 C10337) following the manufacturer's protocol. For myocyte proliferation measurements,  
78 heart sections were stained with  $\alpha$ -sarcomeric actin (Sigma, A2172), WGA (Life  
79 Technologies W32466), and either EdU, Ki67 (Abcam ab15580), or pH3 (Millipore 06-  
80 570). Cell nuclei were stained with 4',6-diamidino-2phenylindole (DAPI, Millipore  
81 268298). The heart was collected during terminal study and cut horizontally into 4  
82 sections from base to apex. Slides were made and used for histological analysis. Images  
83 were taken for each of the 4 sections of the heart. In total, images of the atria (4-5 images),  
84 left ventricle (LV, 12-20 images), and right ventricle (RV, 12-20 images) were taken for  
85 each mouse heart using a 20X objective. The images included pictures of the  
86 endocardium, myocardium, and epicardium of the Atria, LV, and RV. NIS Confocal  
87 analysis software was used to analyze the images.

88 For angiogenesis measurements, heart slides were stained with CD31 (R&D Systems  
89 AF3628) and EdU to quantify capillary density and size, and endothelial cell proliferation.  
90 Heart sections were stained with  $\alpha$ -smooth muscle actin ( $\alpha$ SMA, Abcam ab5694) to label  
91 fibroblasts. CD45 (R&D Systems AF114) and EdU staining labeled proliferative immune

92 cells in the heart. Apoptotic cells were detected by Terminal deoxynucleotidyl transferase-  
93 mediated deoxyuridine triphosphate nick-end labeling (TUNEL) staining using DeadEnd  
94 Fluorometric TUNEL system (G3250, Promega; Madison, WI). Analysis was done using  
95 Object Count tool on NIS confocal analysis software.

96 *MADM<sup>Myh6-MerCreMer</sup>* mice hearts were fixed in 0.05% paraformaldehyde (PFA) in PBS  
97 solution, embedded in Tissue-Tek O.C.T. Compound (Sakura 4583), and slides were  
98 prepared by cryosectioning tissue. Slides were stained with WGA and DAPI; green  
99 fluorescent protein (GFP) and red fluorescent protein (RFP) were auto-fluorescent from  
100 the tamoxifen-induced Cre-loxP recombination<sup>24</sup>. Images were taken using the Nikon  
101 Eclipse Ti Confocal microscope and analyzed using NIH ImageJ software for the total  
102 number of yellow cardiomyocytes (both GFP+ and RFP+), and single labeled GFP+ and  
103 RFP+ cardiomyocytes.

104 All representative images chosen were the best images that represent the mean of the  
105 data.

## 106 **Cardiomyocyte Isolation**

107 Myocytes were isolated from the LV and RV of the heart as previously described<sup>65-67</sup>.  
108 Briefly, the aorta of the heart was cannulated and perfused with collagenase type II  
109 (Worthington LS004177) to enzymatically digest the heart. When the myocardium was  
110 softened, the atria were removed, and the ventricles were separated and placed in  
111 separate dishes. The LV and RV of the heart were mechanically dissociated to yield single  
112 cardiomyocytes. Numbers of LV-/RV-isolated single cardiomyocytes were counted with  
113 hemocytometer respectively. The cell solution was replaced with a solution containing  
114 bovine serum albumin (BSA) and calcium. Myocytes were plated on laminin coated

115 dishes and placed in a 37C incubator for 30 minutes to allow cells to adhere to the dish.  
116 Then, dishes containing the myocytes were washed in Normal Tyrode's solution and fixed  
117 with 4% paraformaldehyde in PBS. Dishes were handled very carefully to reduce myocyte  
118 loss. For staining, myocytes were permeabilized using a Triton X (Sigma T8787) diluted  
119 solution and dishes were stained with EdU and DAPI. Images were taken on the Nikon  
120 Eclipse Ti Confocal microscope. At least 100 isolated cardiomyocytes from the LV and  
121 RV of each mouse were analyzed. NIS Confocal analysis software and ImageJ were used  
122 to analyze the images.

### 123 **Liquid Chromatography-Mass Spectrometry (LC-MS)**

124 Liquid chromatography-Mass spectrometry was performed on normoxic and hypoxic  
125 plasma samples of MADM<sup>Myh6-MerCreMer</sup> mice that were collected at the end of the study  
126 (2-3 days following the last tamoxifen injection), to measure Tamoxifen (TAM) and its  
127 metabolite, 4-hydroxytamoxifen (4OHTAM). The metabolomics analysis was performed  
128 at The Wistar Institute Proteomics and Metabolomics Shared Resource on a Thermo Q-  
129 Exactive HF-X mass spectrometer purchased with NIH grant S10 OD023586.

130 Tamoxifen (TAM) and (Z)-4-Hydroxytamoxifen (4OHTAM) were purchased from Toronto  
131 Research Chemicals (catalog# T006077 and H954757, respectively), and 1 mg/ml stock  
132 solutions were made in methanol and stored at -20 °C. Mouse plasma was deproteinated  
133 and extracted with 10-fold volume ice-cold 80% methanol, 0.1% formic acid that was  
134 spiked with 1.5 µM heavy-labeled amino acid internal standard mix (MSK-A2-1.2;  
135 Cambridge Isotope Laboratories). Extracts were stored at -80 °C prior to analysis. Matrix-  
136 matched calibration standards ranging from 0.008 to 500 ng/ml were generated from TAM  
137 and 4OHTAM in a pool of plasma extracts from mice that were not treated with TAM. LC-

138 MS analysis was performed on a Vanquish Horizon UHPLC in-line with a Thermo  
139 Scientific Q-Exactive HF-X mass spectrometer with HESI II probe. Chromatographic  
140 separation used a Synergi Polar-RP column (100 × 2 mm, 4 μm particle size,  
141 Phenomenex) at 45 °C with a flow rate of 0.3 ml/min. Solvent A was 0.1% formic acid,  
142 and solvent B was acetonitrile, 0.1% formic acid. The gradient was 5% to 95% B over 10  
143 min, hold at 95% B for 4 min, 95 to 5% B over 0.1 min, and hold at 5% B for 5.9 min. The  
144 autosampler was held at 4 °C, and 2 μl of each calibration standard or sample was  
145 injected. The MS method was performed in positive polarity and used full MS scans from  
146 72-260 m/z for 0-3 min (for heavy standards) followed by selected ion monitoring (SIM)  
147 scans from 350-400 m/z for 3-20 min (for TAM and 4OHTAM). Scans were acquired at  
148 120,000 resolutions with 3e6 automatic gain control (AGC) and 100 ms injection time (IT).  
149 Other relevant MS parameters: sheath gas flow rate, 10; spray voltage, 4 kV; capillary  
150 temperature, 320 °C; and funnel RF level, 40.

151 Data analysis was performed using TraceFinder 4.1 (Thermo Fisher Scientific).  
152 Compounds were detected by the ICIS detection algorithm with default parameters based  
153 on the calculated mass of [M+H]<sup>+</sup>+1 adducts with 5 ppm mass error and retention time  
154 match of analytical standards. Quantitation used integrated peak area. External  
155 calibration curves were generated using quadratic curve-fit with 1/x<sup>2</sup> weighting (R<sup>2</sup> =  
156 0.9924 and 0.9912 for TAM and 4OHTAM, respectively). Compound stability during the  
157 course of the analysis was assessed by analyzing 2-3 calibration standards at the  
158 beginning and end of the sample sequence (RSD < 10%). Reproducibility of extraction  
159 was verified by recovery of the internal standards (RSD < 20%).

160 **Real-time polymerase chain reaction (RT-PCR)**

161 Hearts were collected, rinsed with PBS, and snap frozen in liquid nitrogen during harvest.  
162 Total RNA was extracted from frozen cardiac tissue using miRNeasy Mini Kit (Qiagen  
163 217004) following the manufacturer's instructions. Then samples were digested with  
164 DNase I (Invitrogen 18068) to remove genomic DNA. SuperScript III first strand synthesis  
165 system (Invitrogen 18080) was used to synthesize DNA. RT-PCR was performed using  
166 the Quantifast Sybrgreen PCR kit (Qiagen) and the StepOnePlus Real-Time PCR system  
167 (Applied Biosystems). Ct values were normalized to beta-2 microglobulin ( $\beta$ 2M), and fold  
168 changes were calculated with respect to normoxia control mice. The following primer sets  
169 were used (forward, reverse):  $\beta$ 2M 5'- ATGTGAGGCGGGTGGAACTG, 5'-  
170 CTCGGTGACCCTGGTCTTTCTG; Periostin (Postn) 5'- TATGCTCTGCTGCTGCTGTT,  
171 5'- TTTCTTCCCGCAGATAGCAC; Col1A1 5'- GCCAAGAAGACATCCCTGAA, 5'-  
172 GCCATTGTGGCAGATACAGA; Col3A1 5'- AGAGGCTTTGATGGACGCAA, 5'-  
173 CCACCAGGACTGCCGTTATT.

#### 174 **RNA Sequencing**

175 Standard RNA sequencing of extracted RNA from frozen hearts (n=3 per group) of male  
176 (normoxia) controls (MC), male hypoxia (MH), female controls (FC), and female hypoxia  
177 (FH) were performed by Fox Chase Cancer Center (Philadelphia, PA) with an average of  
178 30 million reads per sample. The reagent used for RNA sequencing was NEBNext®  
179 Ultra™ Directional RNA Library Prep Kit for Illumina (Cat #E4720L). Stranded mRNA-seq  
180 library: 100-1000ng total RNAs from each sample were used to make library according  
181 to the product guide of stranded mRNA library kit. In short, mRNAs were enriched twice  
182 via poly-T based RNA purification beads and subjected to fragmentation at 94 degrees  
183 for 15 min via divalent cation method. The 1st strand cDNA was synthesized by reverse



184 transcriptase and random primers at 42 degrees for 15 mins, followed by 2nd strand  
185 synthesis at 16 degrees for 1hr. During second strand synthesis, the dUTP was used to  
186 replace dTTP, thereby the second strand was quenched during amplification. A single 'A'  
187 nucleotide is added to the 3' ends of the blunt fragments at 37 degrees for 30 min.  
188 Adapters with illuminaP5, P7 sequences as well as indices were ligated to the cDNA  
189 fragment at 30 degrees for 10 min. After SPRIselect beads (Beckman Coulter, Cat#  
190 B23318) purification, a 15-cycle PCR reaction was used to enrich the fragments. PCR  
191 was set at 98 degrees for 10 sec, 60 degrees for 30 sec and extended at 72 degrees for  
192 30 sec. Libraries were again purified using SPRIselect beads, had a quality check on  
193 Agilent 2100 bioanalyzer (serial # DE34903146) using Agilent high sensitive DNA kit  
194 (Cat# 5067-4626), and quantified with Qubit 3.0 fluorometer (ThermoFisher Scientific,  
195 Cat#Q33216) using Qubit 1x dsDNA HS assay kit (Cat#Q33230). Sample libraries were  
196 subsequently pooled and loaded to the Hiseq 2500 (Illumina, serial number SN930).  
197 Paired end reads at 75bp were generated by using Nextseq 2000 P2 reagent kit (Illumina,  
198 Cat# 20046811). Fastq files were obtained at Illumina base space  
199 (<https://basespace.illumina.com>).

200 Raw data quality was evaluated with FastQC, reads were mapped onto Mus musculus  
201 GRCm39 reference genome with Salmon Software. Genome is available on GENCODE.  
202 Quant files were imported, and transcript-level abundance was estimated with R package  
203 Tximport, 39210 genes were mapped. QC was performed, genes with counts per million  
204 (CPM)  $\geq 0.5$  were kept. 15208 genes out of 39210 genes passed filter. Genes were  
205 identified on mapped reads followed by downstream differential expression analysis using  
206 R package DESeq2 performed on the input matrix by DESeq function<sup>68</sup>. Differentially

207 expressed genes (DEGs) that were considered either up- or down- regulated required to  
208 have a false discover rate (FDR) cutoff  $\leq 0.1$  and fold change  $\geq 2$ . The output was  
209 subjected to res function that created a result file detailing log2 fold-change (LFC) and  
210 adjusted p-value for each specific sample: sample comparison. With regularized  
211 logarithm (rlog) function, count data was transformed for visualization on a log2 scale.  
212 Gene counts, log2 fold change and adjusted p-values between comparisons of all 15208  
213 genes were provided in Data Set S2 (Diff\_expression\_all\_comparisons.csv).

214 Gene set enrichment analysis (GSEA) was performed with ClusterProfiler package based  
215 on gene ontology biological process or molecular function, all filter-passed genes with  
216 their log2FC were provided for the analysis. Significant enriched gene sets were  
217 determined with a cutoff p-value 0.05. Top activated and suppressed gene sets were  
218 graphed with R package ggplot. Hierarchical clustering of genes in targeted GO terms  
219 was performed with seaborn.clustermap (0.10.0) module in Python.

220 The RNA-sequencing data discussed in this publication have been deposited in NCBI's  
221 Gene Expression Omnibus<sup>69</sup> and are accessible through GEO Series accession number  
222 GSE221168 (<https://www.ncbi.nlm.nih.gov/geo/query/acc.cgi?acc=GSE221168>).

### 223 **Statistical Analysis and Blinding**

224 All data was analyzed using GraphPad Prism software (Version 9.3.1, GraphPad  
225 Software Inc., San Diego, CA). Data are shown as mean $\pm$ SD and a p-value of  $\leq 0.05$  was  
226 used to determine significance for all statistical analysis. The distributions of all  
227 continuous variables were tested for normality assumptions using the Shapiro-Wilk  
228 normality test using GraphPad Prism. Weight measurements and results of  
229 immunostaining were analyzed using unpaired 2-sample t-test or the Mann-Whitney test

230 depending on the distribution of the data to compare single measurements within the two  
231 treatment groups of normoxia and hypoxia mice. Comparison between multiple groups  
232 were performed by one-way ANOVA, followed by Tukey's post-hoc multiple comparisons  
233 test. For echocardiography parameters, two-way ANOVA followed by Turkey's or Sidak's  
234 multiple comparisons test was used to analyze treatment group differences at each time  
235 point and changes between baseline and terminal time points within each treatment  
236 group. Two-sided testing was used for all statistical tests. Investigators of this study were  
237 blinded to the treatment group of the animals, following tissue harvest. Investigators were  
238 unblinded after data analysis was completed.

### 239 **Data Availability**

240 The data, methods used in the analysis, and materials used to conduct the research will  
241 be made available to any researcher for purposes of reproducing the results. Data of  
242 standard RNA-sequencing have been deposited in NCBI's Gene Expression Omnibus<sup>69</sup>  
243 and are accessible through GEO Series accession number GSE221168  
244 (<https://www.ncbi.nlm.nih.gov/geo/query/acc.cgi?acc=GSE221168>).

245

246

247

248

249

250

## 251 Supplemental Figures and Legends

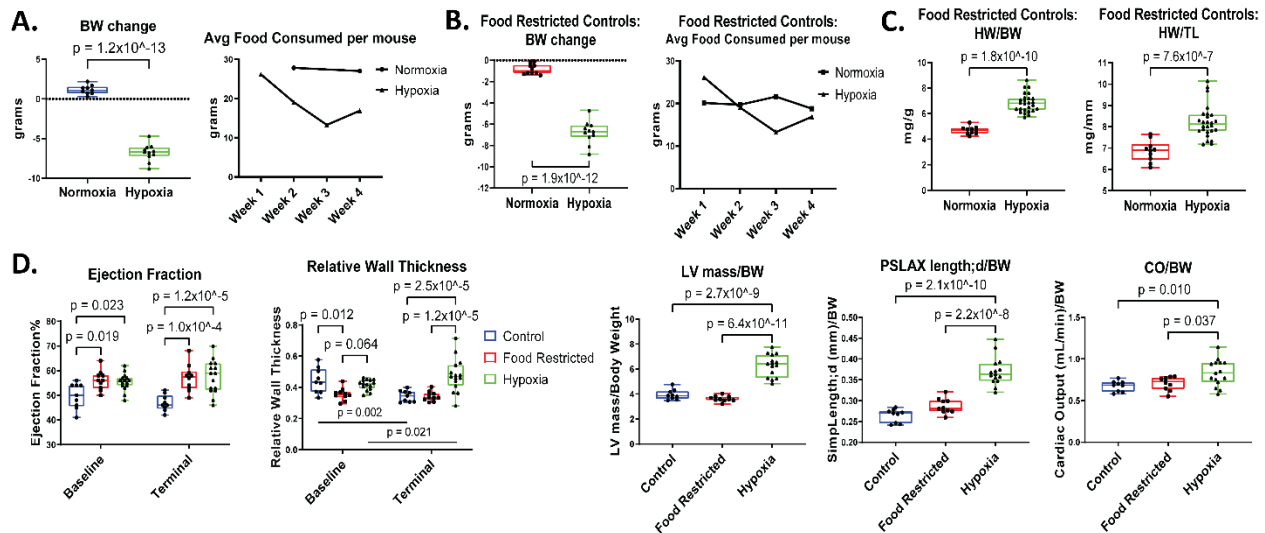

252

253 **Figure S1. Hypoxia induces cardiac hypertrophy and maintains cardiac function**  
 254 **when compared to control mice on a food restricted diet.**

255 A: Change in body weight (BW) of normoxia controls and hypoxia mice from baseline to  
 256 terminal study. The average amount of food each mouse consumed was weighed weekly  
 257 and recorded (normoxia n=9, hypoxia n=11). B: Body weight change and weekly food  
 258 intake for each mouse was calculated from the beginning to end of study for normoxia  
 259 controls on a food restricted diet and hypoxia mice (n=10-11). C: Heart weight to body  
 260 weight (HW/BW) and heart weight to tibia length (HW/TL) of food restricted controls and  
 261 mice at low oxygen (food restricted normoxia n=10, hypoxia n=26). D: Echocardiography  
 262 was performed on normoxia controls, food restricted normoxia controls, and hypoxia mice  
 263 to measure ejection fraction and relative wall thickness at baseline and terminal. Left  
 264 ventricular (LV) mass, parasternal long axis (PSLAX) length of the LV, and cardiac output  
 265 (CO) relative to body weight was also determined (n=9-15). Data represented as  
 266 mean  $\pm$  SD.

267

268

269

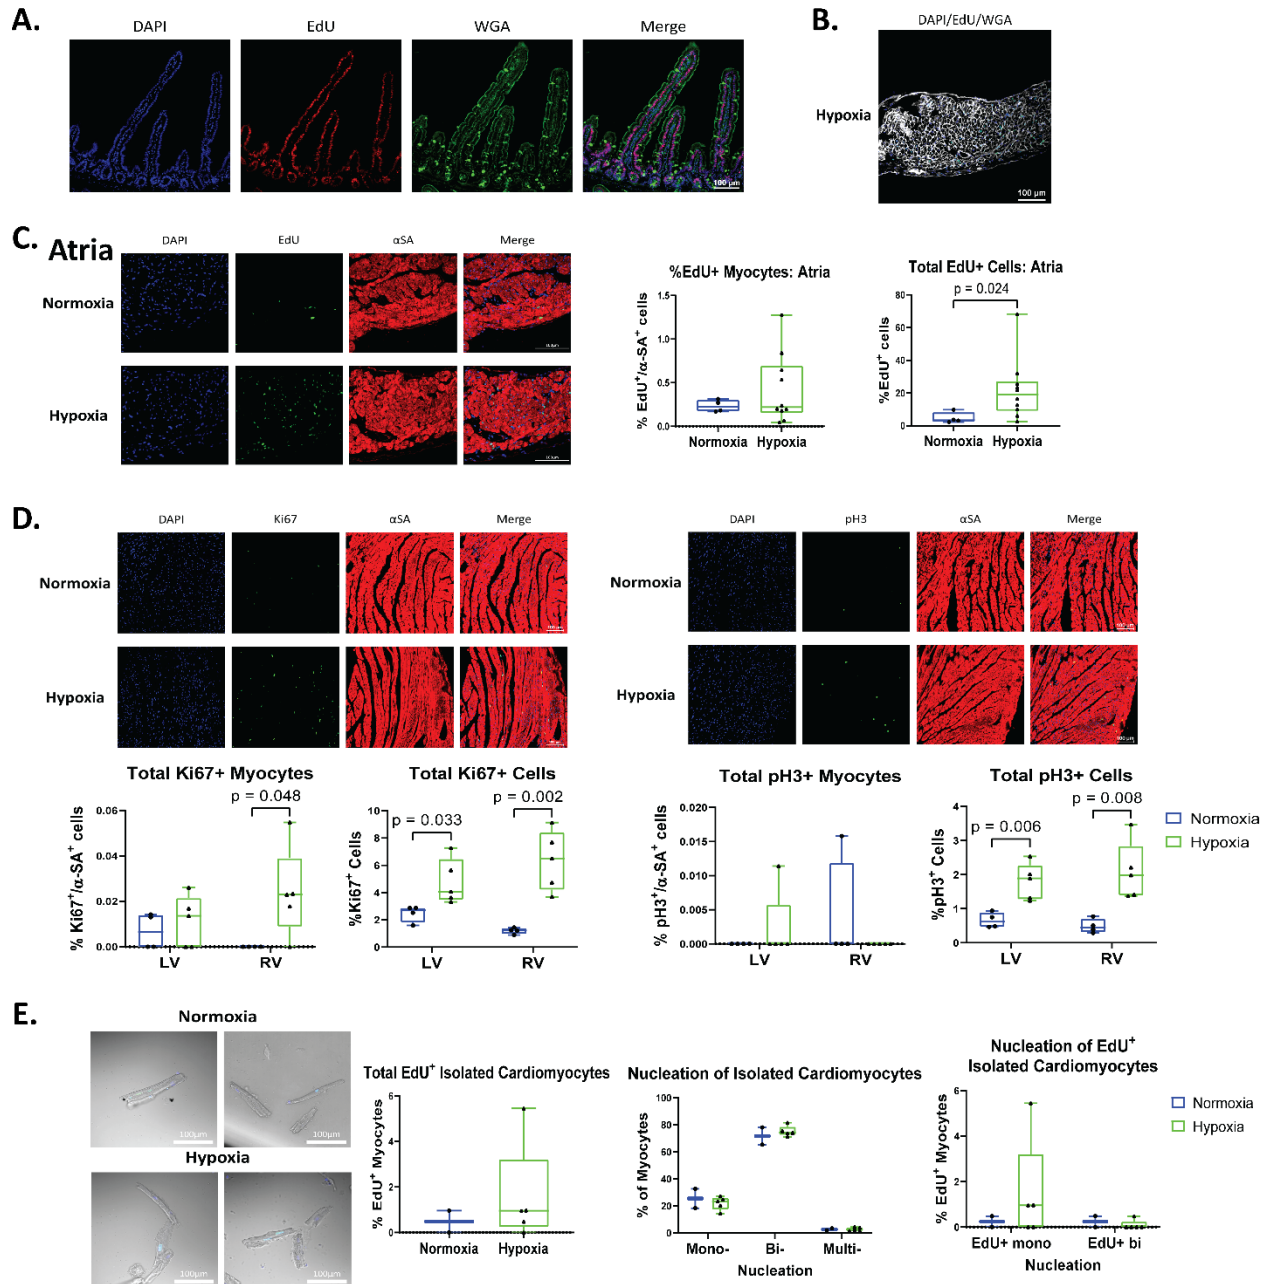

270

271 **Figure S2. Efficacy of EdU minipumps and additional evidence of cardiomyocyte**  
 272 **proliferation.**

273 A: EdU minipumps were placed in control mice for 28 days and intestinal tissue was  
 274 collected at harvest. Representative images of murine intestinal tissue stained with WGA  
 275 (green, labels membrane of cells), EdU (red, cells in DNA synthesis), and DAPI (blue,  
 276 nuclei). B: For analysis of total EdU+ myocytes, mouse heart sections were stained with

277 WGA (white), EdU (green), and DAPI (blue) to quantify proliferating myocytes. C: Atrial  
278 sections of the heart were labeled with alpha-sarcomeric actin ( $\alpha$ SA, red, stains  
279 cardiomyocytes), EdU (green), and DAPI (blue). Quantification of EdU+ cardiomyocytes  
280 and total EdU+ cells in the Atria of normoxia and hypoxia mice (normoxia n=4, hypoxia  
281 n=10). D: Representative images of cardiac tissues stained with  $\alpha$ SA (red), DAPI (blue),  
282 and either Ki67 (green, cells in DNA synthesis) or pH3 (green, cells in mitosis).  
283 Quantification of total Ki67+ or total pH3+ cardiomyocytes and cells in LV and RV sections  
284 of the heart (normoxia n=4, hypoxia n=5) E: Isolated ventricular cardiomyocytes from  
285 normoxia and hypoxia mice were labeled with EdU (green) and DAPI (blue). Total EdU+  
286 myocytes, nucleation of total myocytes, and nucleation of EdU+ myocytes was quantified.  
287 Data represented as mean $\pm$ SD.

288

289

290

291

292

293

294

295

296

297

298

299

300

301

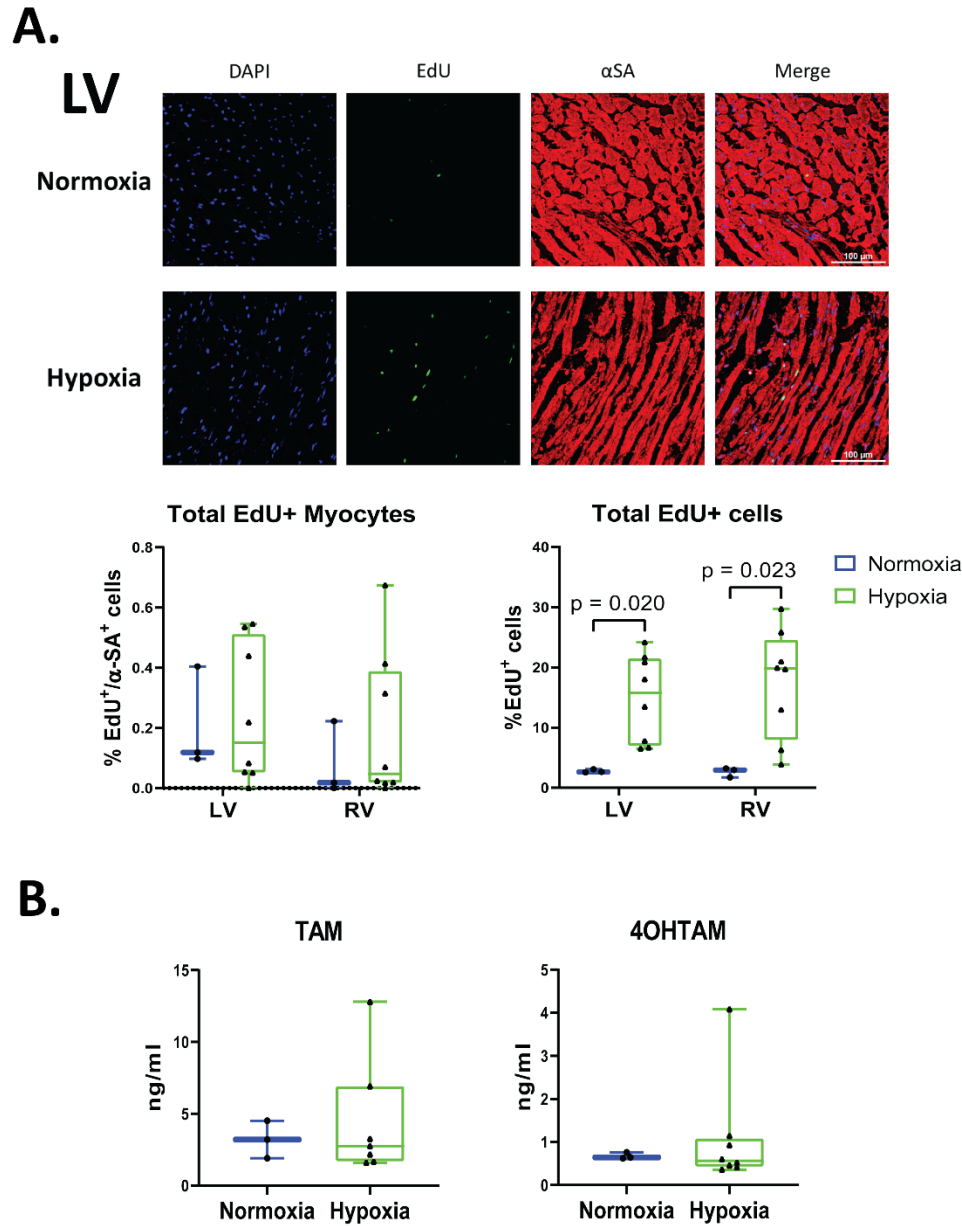

302

303 **Figure S3. Hypoxia stimulates DNA synthesis in cardiomyocytes and non-myocyte**  
 304 **cells and reduces metabolism of tamoxifen in MADM mice.**

305 A: Representative confocal images of left ventricular (LV) sections of hearts from  
 306 normoxic and hypoxic MADM<sup>Myh6-MerCreMer</sup> mice were labeled with  $\alpha$ SA (red,  
 307 cardiomyocytes), EdU (green, cells in DNA synthesis), and DAPI (blue, nuclei), following  
 308 harvest. Total EdU+ myocytes and EdU+ cells were quantified in LV and right ventricular  
 309 (RV) heart sections (normoxia n=3, hypoxia n=8). B: Absolute levels of Tamoxifen (TAM)

310 and its metabolite, 4-hydroxytamoxifen (4OHTAM) were measured from plasma of  
311 normoxic and hypoxic MADM<sup>Myh6-MerCreMer</sup> mice. Data represented as mean±SD.

312

313

314

315

316

317

318

319

320

321

322

323

324

325

326

327

328

329

330

331

332

333



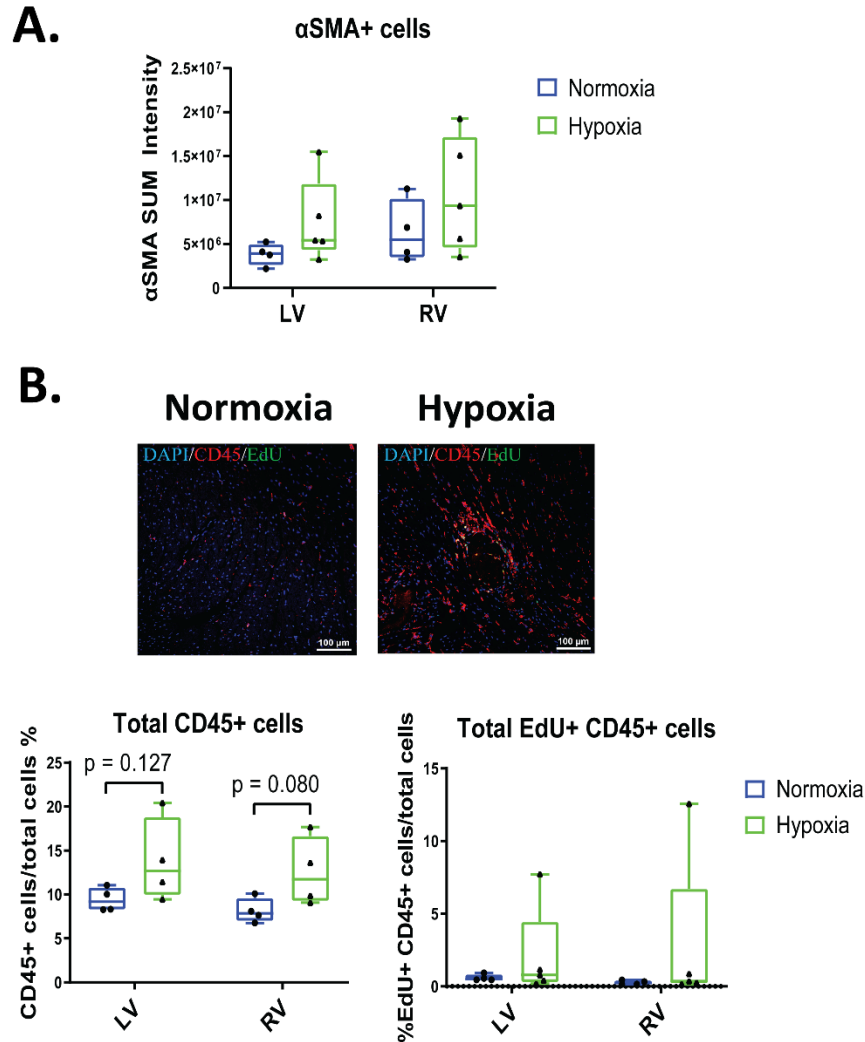

334

335 **Figure S4. Increase of fibroblasts and immune cells in hearts under chronic**  
 336 **hypoxemia.**

337 A: Normoxic and hypoxic hearts were stained with alpha-smooth muscle actin ( $\alpha$ SMA)  
 338 and SUM intensity was quantified in LV and RV myocardium. B: Cardiac ventricles were  
 339 labeled with CD45 (red, stains immune cells), EdU (green), and DAPI (blue) to analyze  
 340 total CD45+ cells and total EdU+ CD45+ cells in normoxia and hypoxia mice (n=4-5).  
 341 Data represented as mean $\pm$ SD.

342

343

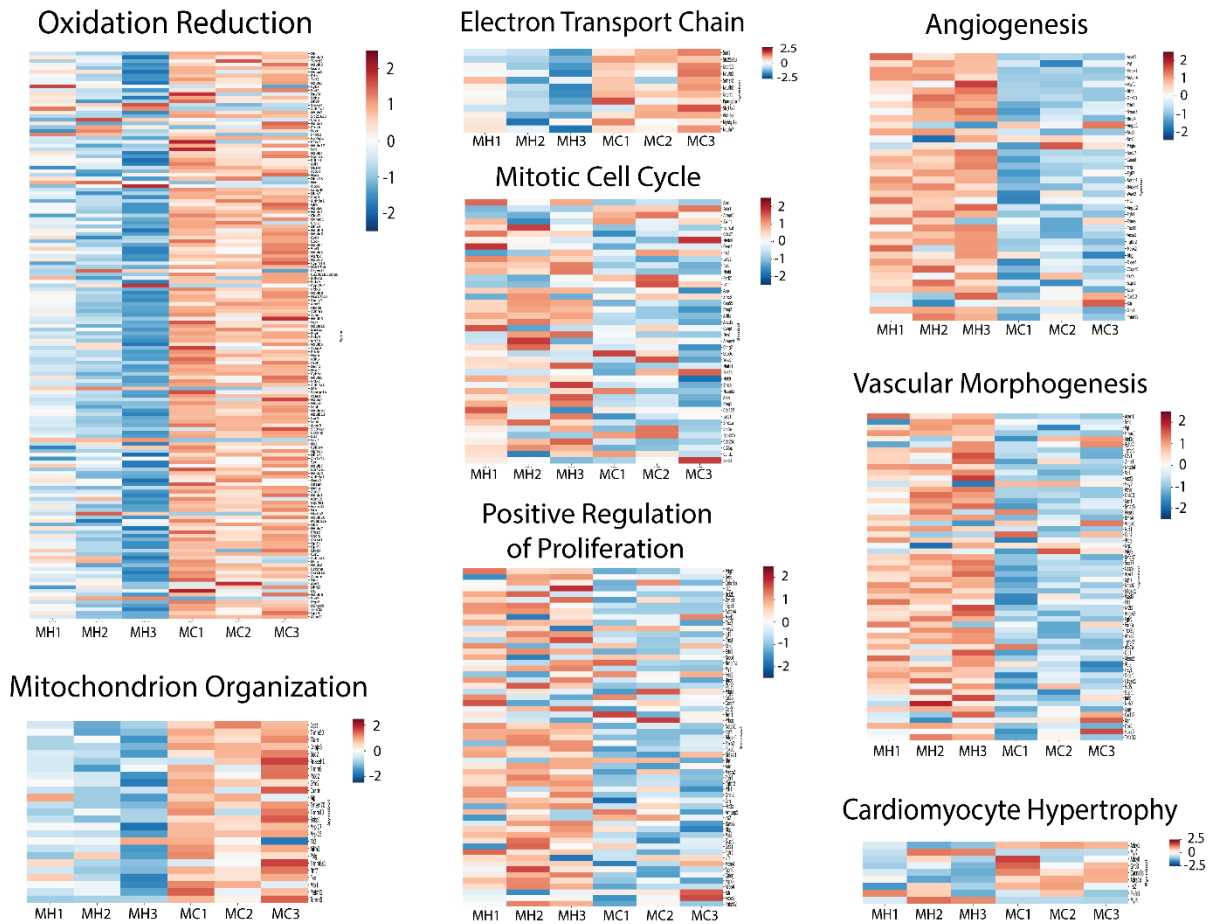

344

345 **Figure S5. Heat maps of several biological processes in normoxic and hypoxic**  
 346 **male hearts.**

347 Analysis of RNA sequencing on ventricles of male hearts revealed biological processes  
 348 that are differentially regulated in hypoxia (MH) mice and normoxia controls (MC).  
 349 Upregulated and down regulated genes are shown as red and blue, respectively (n=3).

350

351

352

353

354



356 **Figure S6. Hypoxia alters the mitotic cell cycle in male hearts.**

357 A and B: Analysis of RNA sequencing on ventricles of male hearts revealed heat maps  
358 of S phase and G2/M phase of the mitotic cell cycle that are differentially regulated in  
359 hypoxia (MH) mice and normoxia controls (MC). Upregulated and down regulated genes  
360 are shown as red and blue, respectively (n=3). C: Graph of the expression level of genes  
361 in S phase, G2/M phases, and G0 to G1 transition of the mitotic cell cycle. The x-axis  
362 represents the average expression level of each gene from each group. The y-axis  
363 represents the number of genes that fall into the range of that expression level. Hypoxia  
364 group (MH) is labeled green, and normoxia group (MC) is labeled blue.

365

366

367

368

369

370

371

372

373

374

375

376

377

378

379

380

381

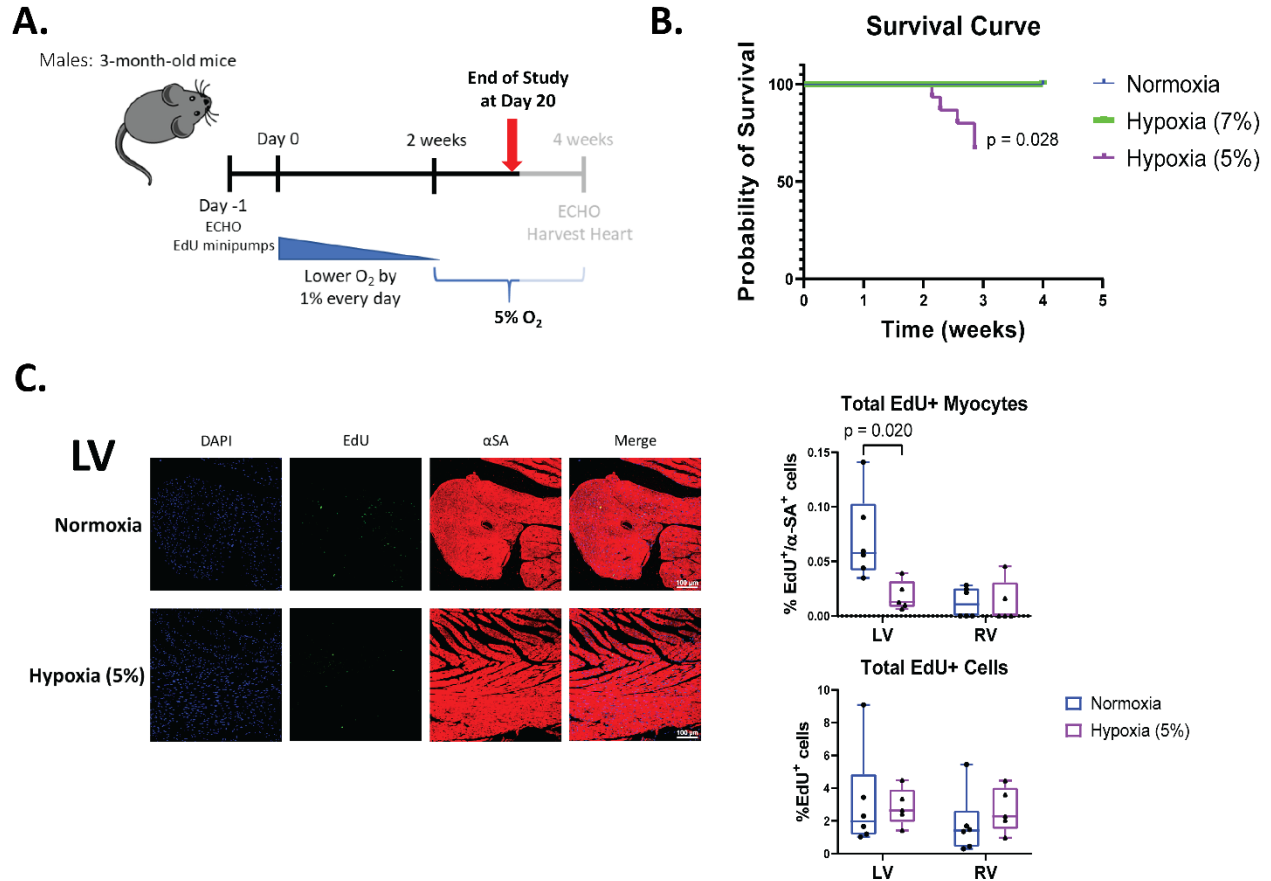

382

383 **Figure S7. Severe hypoxemia (5% oxygen) causes death and inhibits cell**  
 384 **proliferation in male mice.**

385 A: Schematic of severe hypoxia treatment with gradual reduction in oxygen to reach 5%  
 386 oxygen. B: Survival curve of male mice exposed to normoxia (20.9% oxygen), hypoxia  
 387 (7% oxygen), and severe hypoxia (5% oxygen) during the study (n=6-15). C: Cardiac  
 388 tissue was stained with alpha-sarcomeric actin ( $\alpha$ SA, red, labels cardiomyocytes), EdU  
 389 (green, cells undergoing DNA synthesis), and DAPI (blue, nuclei) to measure cell  
 390 proliferation. Total EdU+ myocytes and EdU+ cells were quantified in the left ventricle  
 391 (LV) and right ventricle (RV) of the heart (n=5-6). Data represented as mean $\pm$ SD.

392

393
