# Supplementary material
Source: PubMed Central journal article supplement (PMC10023496)
Supplement: NIHMS1872348-supplement-321604_Major_Resources_Table.pdf [file NIHMS1872348-supplement-321604_Major_Resources_Table.pdf]

## Major Resources Table

In order to allow validation and replication of experiments, all essential research materials listed in the Methods should be included in the Major Resources Table below. Authors are encouraged to use public repositories for protocols, data, code, and other materials and provide persistent identifiers and/or links to repositories when available. Authors may add or delete rows as needed.

### Animals (in vivo studies)

| Species | Vendor or Source       | Background Strain | Sex  | Persistent ID / URL                                                               |
|---------|------------------------|-------------------|------|-----------------------------------------------------------------------------------|
| Mouse   | The Jackson Laboratory | C57BL/6J          | M, F | <a href="https://www.jax.org/strain/000664">https://www.jax.org/strain/000664</a> |
| Mouse   | The Jackson Laboratory | C57BL/6:129SVJ    | M, F | Details below in Genetically Modified Animals                                     |

### Genetically Modified Animals

|        | Species | Vendor or Source       | Background Strain | Other Information           | Persistent ID / URL                                                               |
|--------|---------|------------------------|-------------------|-----------------------------|-----------------------------------------------------------------------------------|
| Parent | Mouse   | The Jackson Laboratory | C57BL/6:129SVJ    | Myh6-merCremer              | <a href="https://www.jax.org/strain/005657">https://www.jax.org/strain/005657</a> |
| Parent | Mouse   | The Jackson Laboratory | C57BL/6:129SVJ    | MADM-ML-11 <sup>GT/TG</sup> | <a href="https://www.jax.org/strain/030578">https://www.jax.org/strain/030578</a> |

### Antibodies

| Target antigen        | Vendor or Source  | Catalog #        | Working concentration                                                | Lot # (preferred but not required) | Persistent ID / URL                                                                                                                                                                                                                       |
|-----------------------|-------------------|------------------|----------------------------------------------------------------------|------------------------------------|-------------------------------------------------------------------------------------------------------------------------------------------------------------------------------------------------------------------------------------------|
| Picro-Sirius Red      | Abcam             | ab150681         | Details in Protocol: Picro Sirius Red Stain Kit                      |                                    | <a href="https://www.abcam.com/picro-sirius-red-stain-kit-connective-tissue-stain-ab150681.html">https://www.abcam.com/picro-sirius-red-stain-kit-connective-tissue-stain-ab150681.html</a>                                               |
| Wheat Germ Agglutinin | Life Technologies | W11261<br>W32466 | 1:100                                                                |                                    | <a href="https://www.thermofisher.com/order/catalog/product/W11261">https://www.thermofisher.com/order/catalog/product/W11261</a>                                                                                                         |
| EdU                   | Life Technologies | C10337           | Details in Protocol: Click-IT EdU Cell Proliferation Kit for Imaging |                                    | <a href="https://www.thermofisher.com/order/catalog/product/C10337">https://www.thermofisher.com/order/catalog/product/C10337</a>                                                                                                         |
| α-sarcomeric actin    | Sigma             | A2172            | 1:500                                                                |                                    | <a href="https://www.sigmaaldrich.com/US/en/product/sigma/a2172">https://www.sigmaaldrich.com/US/en/product/sigma/a2172</a>                                                                                                               |
| Ki67                  | Abcam             | ab15580          | 1:300                                                                |                                    | <a href="https://www.abcam.com/ki67-antibody-ab15580.html">https://www.abcam.com/ki67-antibody-ab15580.html</a>                                                                                                                           |
| pH3                   | Millipore         | 06-570           | 1:300                                                                |                                    | <a href="https://www.emdmillipore.com/US/en/product/Anti-phospho-Histone-H3-Ser10-Antibody-Mitosis-Marker,MM_NF-06-570">https://www.emdmillipore.com/US/en/product/Anti-phospho-Histone-H3-Ser10-Antibody-Mitosis-Marker,MM_NF-06-570</a> |

DOI [to be added]

|                               |             |        |                                                        |  |                                                                                                                                                                                                                                                         |
|-------------------------------|-------------|--------|--------------------------------------------------------|--|---------------------------------------------------------------------------------------------------------------------------------------------------------------------------------------------------------------------------------------------------------|
| DAPI                          | Millipore   | 268298 | 1:1000                                                 |  | <a href="https://www.emdmillipore.com/US/en/product/DAPI-Dihydrochloride-CAS-28718-90-3-Calbiochem,EMD_BIO-268298">https://www.emdmillipore.com/US/en/product/DAPI-Dihydrochloride-CAS-28718-90-3-Calbiochem,EMD_BIO-268298</a>                         |
| CD31                          | R&D Systems | AF3628 | 1:30                                                   |  | <a href="https://www.rndsystems.com/products/mouse-rat-cd31-pecam-1-antibody_af3628">https://www.rndsystems.com/products/mouse-rat-cd31-pecam-1-antibody_af3628</a>                                                                                     |
| $\alpha$ -smooth muscle actin | Abcam       | ab5694 | 1:100                                                  |  | <a href="https://www.abcam.com/alpha-smooth-muscle-actin-antibody-ab5694.html">https://www.abcam.com/alpha-smooth-muscle-actin-antibody-ab5694.html</a>                                                                                                 |
| CD45                          | R&D Systems | AF114  | 1:100                                                  |  | <a href="https://www.rndsystems.com/products/mouse-cd45-antibody_af114">https://www.rndsystems.com/products/mouse-cd45-antibody_af114</a>                                                                                                               |
| TUNEL                         | Promega     | G3250  | Details in Protocol: DeadEnd Fluorometric TUNEL system |  | <a href="https://www.promega.com/products/cell-health-assays/apoptosis-assays/deadend-fluorometric-tunel-system/?catNum=G3250">https://www.promega.com/products/cell-health-assays/apoptosis-assays/deadend-fluorometric-tunel-system/?catNum=G3250</a> |

### DNA/cDNA Clones

| Clone Name        | Sequence                                                        | Source / Repository                    | Persistent ID / URL                                                                                                                                                                                                                                        |
|-------------------|-----------------------------------------------------------------|----------------------------------------|------------------------------------------------------------------------------------------------------------------------------------------------------------------------------------------------------------------------------------------------------------|
| $\beta$ 2M        | 5'-<br>ATGTGAGGCGGGTGGAAGTCTG,<br>5'-<br>CTCGGTGACCCTGGTCTTTCTG | NIH National Library of Medicine, NCBI | <a href="https://ncbi.nlm.nih.gov/gene/">https://ncbi.nlm.nih.gov/gene/</a><br><br><a href="https://www.ncbi.nlm.nih.gov/tools/primer-blast/index.cgi?LINK_LOC=BlastHome">https://www.ncbi.nlm.nih.gov/tools/primer-blast/index.cgi?LINK_LOC=BlastHome</a> |
| Periostin (Postn) | 5'-<br>TATGCTCTGCTGCTGCTGTT,<br>5'-<br>TTTCTTCCCGCAGATAGCAC     | NIH National Library of Medicine, NCBI | <a href="https://ncbi.nlm.nih.gov/gene/">https://ncbi.nlm.nih.gov/gene/</a><br><br><a href="https://www.ncbi.nlm.nih.gov/tools/primer-blast/index.cgi?LINK_LOC=BlastHome">https://www.ncbi.nlm.nih.gov/tools/primer-blast/index.cgi?LINK_LOC=BlastHome</a> |
| Col1A1            | 5'-<br>GCCAAGAAGACATCCCTGAA,<br>5'-<br>GCCATTGTGGCAGATACAGA     | NIH National Library of Medicine, NCBI | <a href="https://ncbi.nlm.nih.gov/gene/">https://ncbi.nlm.nih.gov/gene/</a><br><br><a href="https://www.ncbi.nlm.nih.gov/tools/primer-blast/index.cgi?LINK_LOC=BlastHome">https://www.ncbi.nlm.nih.gov/tools/primer-blast/index.cgi?LINK_LOC=BlastHome</a> |
| Col3A1            | 5'-<br>AGAGGCTTTGATGGACGCAA,<br>5'-<br>CCACCAGGACTGCCGTTATT     | NIH National Library of Medicine, NCBI | <a href="https://ncbi.nlm.nih.gov/gene/">https://ncbi.nlm.nih.gov/gene/</a><br><br><a href="https://www.ncbi.nlm.nih.gov/tools/primer-blast/index.cgi?LINK_LOC=BlastHome">https://www.ncbi.nlm.nih.gov/tools/primer-blast/index.cgi?LINK_LOC=BlastHome</a> |

### Cultured Cells

| Name | Vendor or Source | Sex (F, M, or unknown) | Persistent ID / URL |
|------|------------------|------------------------|---------------------|
|      |                  |                        |                     |

### Data & Code Availability

| Description    | Source / Repository         | Persistent ID / URL                                                                                                                                                    |
|----------------|-----------------------------|------------------------------------------------------------------------------------------------------------------------------------------------------------------------|
| RNA Sequencing | GEO database (NIH NLM NCBI) | Accession number: GSE221168<br><a href="https://www.ncbi.nlm.nih.gov/geo/query/acc.cgi?acc=GSE221168">https://www.ncbi.nlm.nih.gov/geo/query/acc.cgi?acc=GSE221168</a> |

### Other

| Description | Source / Repository | Persistent ID / URL |
|-------------|---------------------|---------------------|
|             |                     |                     |

DOI [to be added]

|                                                        |                                              |                                                                                                                                                                                                                                                                                                             |
|--------------------------------------------------------|----------------------------------------------|-------------------------------------------------------------------------------------------------------------------------------------------------------------------------------------------------------------------------------------------------------------------------------------------------------------|
| 5-ethynyl-2'-deoxyuridine (EdU, drug administration)   | Life Technologies, catalog# E10187           | <a href="https://www.thermofisher.com/order/catalog/product/E10187">https://www.thermofisher.com/order/catalog/product/E10187</a>                                                                                                                                                                           |
| Tamoxifen (drug administration)                        | Sigma                                        | <a href="https://www.sigmaaldrich.com/US/en/substance/tamoxifen3715110540291">https://www.sigmaaldrich.com/US/en/substance/tamoxifen3715110540291</a>                                                                                                                                                       |
| Tamoxifen (TAM, for analysis in LC-MS)                 | Toronto Research Chemicals, catalog# T006077 | <a href="https://www.trc-canada.com/product-detail/?T006077">https://www.trc-canada.com/product-detail/?T006077</a>                                                                                                                                                                                         |
| (Z)-4-Hydroxytamoxifen (4OHTAM, for analysis in LC-MS) | Toronto Research Chemicals, catalog# H954757 | <a href="https://www.trc-canada.com/product-detail/?H954757">https://www.trc-canada.com/product-detail/?H954757</a>                                                                                                                                                                                         |
| miRNeasy Mini Kit                                      | Qiagen, catalog# 217004                      | <a href="https://www.qiagen.com/us/products/discovery-and-translational-research/dna-rna-purification/rna-purification/mirna/mirneasy-kits?catno=217004">https://www.qiagen.com/us/products/discovery-and-translational-research/dna-rna-purification/rna-purification/mirna/mirneasy-kits?catno=217004</a> |

## ARRIVE GUIDELINES

The ARRIVE guidelines (<https://arriveguidelines.org/>) are a checklist of recommendations to improve the reporting of research involving animals. Key elements of the study design should be included below to better enable readers to scrutinize the research adequately, evaluate its methodological rigor, and reproduce the methods or findings.

### Study Design

| Groups            | Sex  | Age            | Number (prior to experiment) | Number (after termination) | Littermates (Yes/No) | Other description                        |
|-------------------|------|----------------|------------------------------|----------------------------|----------------------|------------------------------------------|
| Group 1 (Control) | M, F | 9-12 weeks old | 32                           | 32                         | No                   | Normoxia (20.9 oxygen)                   |
| Group 2           | M, F | 9-12 weeks old | 44                           | 44                         | No                   | Hypoxia (7% oxygen)                      |
| Group 3 (control) | M    | 9-12 weeks old | 10                           | 10                         | No                   | Normoxia, food restricted (20.9% oxygen) |
| Group 4           | M    | 9-12 weeks old | 15                           | 10                         | No                   | Hypoxia (5% oxygen)                      |

**Sample Size:** Please explain how the sample size was decided Please provide details of any a *prior* sample size calculation, if done.

Sample size was decided based on having a  $p \leq 0.05$  and 80% power for analysis

### Inclusion Criteria

We included male and females in our primary groups 1 and 2. Group 3 was used to eliminate diet/weight-gain as an influencing factor in cardiomyocyte proliferation. Since the results of group 3 were similar to group 1, we decided to use group 1 as the primary control group and included males and females in group 1. Group 4 was used to test if lower oxygen (5%) would increase cardiomyocyte proliferation, but when we concluded that it rather decreased proliferation, we focused on studying group 2 as the primary treatment group to induce myocyte proliferation and included males and females in group 2.

### Exclusion Criteria

Mice that died during hypoxia treatment were excluded from terminal studies and analysis. Mice only died in group 4 from severe hypoxia. We also excluded females from group 3 because the results in males showed no difference when compared to group 1. We excluded females from group 4 because the results in males showed reduced cardiomyocyte proliferation and animal survival, which was more detrimental to mice. Therefore, we focused on the analysis of group 1 vs. group 2 and included both sexes in these groups.

### Randomization

Animals were randomly divided into each group.

### Blinding

Investigators of this study were blinded to the treatment group of the animals, following tissue harvest. Investigators were unblinded after data analysis was completed.

DOI [to be added]
